# Supplementary material for: Gametes of semelparous salmon are repeatedly produced by surrogate rainbow trout
Source: PubMed Central journal article supplement — Sci Adv. 2024 May 24;10(21):eadm8713. doi: 10.1126/sciadv.adm8713 (PMC11122675; doi:10.1126/sciadv.adm8713), 2024-05-24
Supplement: sciadv.adm8713_sm.pdf [file sciadv.adm8713_sm.pdf]

Supplementary Materials for  
**Gametes of semelparous salmon are repeatedly produced by surrogate  
rainbow trout**

Goro Yoshizaki *et al.*

Corresponding author: Goro Yoshizaki, goro@kaiyodai.ac.jp

*Sci. Adv.* **10**, eadm8713 (2024)  
DOI: 10.1126/sciadv.adm8713

**This PDF file includes:**

Tables S1 and S2

**Table S1. Repeated production of Chinook salmon gametes by *dnd*-knockout rainbow trout recipients.** A and B show the results of male and female recipients, respectively. +: production of gamete; -: no production of gamete.

A

| Fish No. | 1 y/o | 2 y/o | 3 y/o | 4 y/o |
|----------|-------|-------|-------|-------|
| 1        | +     | +     | +     | +     |
| 2        | +     | +     | +     | +     |
| 3        | +     | +     | +     | +     |
| 4        | +     | +     | +     | +     |
| 5        | +     | +     | +     | +     |
| 6        | +     | +     | +     | +     |
| 7        | +     | +     | +     | +     |
| 8        | +     | +     | +     | +     |
| 9        | +     | +     | +     | +     |
| 10       | +     | +     | +     | +     |
| 11       | -     | +     | +     | +     |
| 12       | -     | +     | +     | +     |
| 13       | -     | +     | -     | -     |
| 14       | -     | +     | +     | +     |
| 15       | -     | +     | dead  | dead  |
| 16       | -     | +     | +     | +     |
| 17       | -     | +     | +     | -     |

B

| Fish No. | 2 y/o | 3 y/o | 4 y/o |
|----------|-------|-------|-------|
| 1        | +     | +     | +     |
| 2        | +     | +     | dead  |
| 3        | +     | dead  | dead  |
| 4        | +     | +     | +     |
| 5        | +     | +     | +     |
| 6        | +     | +     | +     |
| 7        | +     | +     | +     |
| 8        | -     | +     | dead  |
| 9        | -     | -     | +     |

**Table S2. Repeated production of Kokanee salmon gametes by triploid rainbow trout recipients.** A and B show the results of male and female recipients, respectively. +: production of gamete; -: no production of gamete.

A

| Fish No. | 2 y/o | 3 y/o | 4 y/o | 5 y/o |
|----------|-------|-------|-------|-------|
| 1        | +     | -     | -     | -     |
| 2        | +     | -     | -     | -     |
| 3        | +     | -     | -     | -     |
| 4        | +     | -     | -     | -     |
| 5        | +     | +     | +     | dead  |
| 6        | +     | +     | +     | +     |
| 7        | -     | +     | +     | dead  |

B

| Fish No. | 2 y/o | 3 y/+ | 4 y/+ | 5 y/+ |
|----------|-------|-------|-------|-------|
| 1        | +     | dead  | dead  | dead  |
| 2        | +     | -     | -     | -     |
| 3        | +     | +     | +     | dead  |
| 4        | -     | +     | +     | +     |
| 5        | -     | +     | +     | -     |
